# Supplementary material for: pH-triggered switchable Mg2+-dependent DNAzymes
Source: Royal Society of Chemistry journal article supplement (doi:10.1039/b919417g), 2010-01-01
Supplement: b919417g.pdf [file b919417g.pdf]

Supporting information for the paper:

## “pH-Triggered Mg<sup>2+</sup>-dependent DNAzymes”

*Johann Elbaz, Simcha Shimron and Itamar Willner\**

### ***Experimental Section***

*Material:* 4 2-(N-Morpholino)ethanesulfonic acid sodium salt (MES), sodium chloride and magnesium chloride were purchased from Sigma-Aldrich . DNA oligonucleotides (**3**) and (**3b**) were purchased from Integrated DNA Technologies Inc, (Coralville, IA). The products are HPLC pure, and were characterized by mass spectrometry. All other oligonucleotide sequences were purchased from Sigma-Genosys. Ultrapure water from NANOpure Diamond (Barnstead) source was used in all of the experiments.

*Instrumentation:* Light emission measurements were performed using a Cary Eclipse Device (Varian inc). The fluorophore ROX was excited at 580 nm.

*Assay:* The pH-switchable Mg<sup>2+</sup>-dependent DNAzyme system described in Scheme 1B was studied in a solution consisting of **1** (1μM) ,**2** (1μM) and **3** (1μM) in MES buffer ( 1 M NaCl, 20 mM MgCl<sub>2</sub> pH =7.2 or pH=5.8). The ON-OFF system was generated by adding NaOH (1M) in order to change the pH value from 5.8 to 7.2, and acetic acid (20%) in order to change the pH value from 7.2 to 5.8 into a system containing **1** (10μM) ,**2** (10μM) and **3** (5 μM) in MES buffer ( 1 M NaCl, 20 mM MgCl<sub>2</sub>).

The pH-switchable  $Mg^{2+}$ -dependent DNAzyme system described in Scheme 1C was studied in a solution consisting of **3** (1  $\mu$ M), **4** (1  $\mu$ M), **5** (1  $\mu$ M) and **6** (0.9  $\mu$ M) in MES buffer (1 M NaCl, 20 mM  $MgCl_2$  pH =7.2 or pH=5.8). The ON-OFF system was generated by adding NaOH (1M) in order to change the pH value from 5.8 to 7.2, and 4  $\mu$ L of acetic acid (20%) in order to change the pH value from 7.2 to 5.8 into a system containing **4** (1  $\mu$ M), **5** (1  $\mu$ M) **3** (1  $\mu$ M) and **6** (0.9  $\mu$ M) in MES buffer (1 M NaCl, 20 mM  $MgCl_2$ ).

Nondenaturing polyacrylamide gel electrophoresis: Gels contained 30% polyacrylamide (acrylamide/bis-acrylamide). Tris-borate-EDTA (TBE) was used as the separation buffer and consisted of Tris base (89 Mm, pH=7.9), boric acid (89 mM) and EDTA (2 mM). Gels were run on a Hoefer SE 600 electrophoresis unit at 25°C (300 V, constant voltage) for 3 hours. After electrophoresis, the gels were stained with SYBR Gold nucleic acid gel stain (Invitrogen) and scanned.

The DNA sequences are providing in table S1:

**Table S1:** Different DNA sequences used to construct the pH switchable DNAzyme systems. <sup>[a],[b]</sup>

| Number | Sequence                                                                                  |
|--------|-------------------------------------------------------------------------------------------|
| (1)    | 5' CCC CTT TTC CCC T TA ATG C CA CCC ATG T TA GAG A 3'                                    |
| (2)    | 5' C TGC TCA GCG ATG CAT TAT CCC CTT TTC CCC 3'                                           |
| (3)    | 5' ROX-CONH(CH <sub>2</sub> ) <sub>6</sub> -TCT CTA TrAG GAG CAG-Black Hole Quencher 2 3' |
| (3b)   | 5' ATA CGC TTA TCG GCA CAT GAG A TCT CTA TrA G GAG CAG GAG TGA ACT G 3'                   |
| (4)    | 5' GTG ATG TTA CAAT TGC CAC CCA TGT TAG AGA 3'                                            |
| (5)    | 5' CTG CTC AGC GAT GCA CAT CCC TAA CCC TAA CCC TAA CCC 3'                                 |
| (6)    | 5' TTA <u>G</u> TG TTA <u>G</u> TG ATG ATT GTA ACA TCA C 3'                               |

a. The bases underlined are the two non-complementary bases (T-C).

b. Oligonucleotides were custom ordered from Sigma or Integrated DNA technology and are HPLC purified and characterized by mass-spectrometry.
